# Supplementary material for: RNA-Seq Analysis Reveals Expression Regulatory Divergence of W-Linked Genes between Two Contrasting Chicken Breeds
Source: MDPI journal article supplement (doi:10.3390/ani12091218), 2022-05-09
Supplement: s1 [file s1]

**Table S1.** Statistical results of regulatory divergence of DEGs.

| Gene ID      | Tissue <sup>a</sup> | FC <sup>b</sup>    | Regulatory Diversity <sup>c</sup>        |
|--------------|---------------------|--------------------|------------------------------------------|
| LOC121108191 | B                   | 1.25               | Cd(1),Con(2)                             |
| LOC121108223 | B / L               | 1.31 / 1.36        | Cd(1),Con(2) / Td(1),Con(2)              |
| LOC121108182 | B / M               | 3.78 / 0.27        | Ta(1),Ta(2) / Td(1),Tu(2)                |
| SKA1         | B / L               | 0.23 / 0.41        | Ta(1),Ta(2) / Ta(1),Td(2)                |
| LOC100859467 | B                   | 1.38               | Cd(1),Td(2)                              |
| LOC100859602 | B                   | 1.33               | Cd(1),Td(2)                              |
| LOC121108181 | B / M               | 1.50 / 1.44        | Cd(1),Td(2) / Cd(1),To(2)                |
| LOC121108196 | B / M               | 1.50 / 1.49        | Cd(1),Td(2) / Tu(1),Td(2)                |
| LOC121108216 | B                   | 1.97               | Cd(1),Ta(2)                              |
| LOC374195    | B / M               | 1.48 / 1.34        | Cd(1),Td(2) / Tu(1),Td(2)                |
| LOC769000    | B                   | 1.30               | Cd(1),Td(2)                              |
| LOC107055446 | B                   | 1.38               | Ta(1),Td(2)                              |
| LOC426615    | B / L               | 1.33 / 0.77        | Cd(1),Td(2) / Cd(1),Td(2)                |
| NEDD4L       | B                   | 1.30               | Cd(1),To(2)                              |
| SMAD7B       | B / M               | 1.31 / 1.35        | Con(1),Td(2) / Td(1),Td(2)               |
| LOC101750268 | B / L               | 2.41 / 14.47       | Ta(1),Ta(2) / Ta(1),To(2)                |
| LOC112531967 | B / L / M           | 1.34 / 1.44 / 1.61 | Tu(1),Tu(2) / Td(1),Con(2) / Tu(1),Tu(2) |
| LOC121108203 | L                   | 1.35               | Cd(1),Cd(2)                              |
| LOC121108199 | L / M               | 1.86 / 1.25        | Ta(1),Cd(2) / To(1),Cd(2)                |
| LOC121108229 | L / M               | 2.39 / 0.63        | Ta(1),Cd(2) / Td(1),Cd(2)                |
| LOC121108197 | L / M               | 1.60 / 1.29        | Td(1),Cd(2) / Cd(1),Con(2)               |
| LOC121108201 | L / M               | 1.59 / 1.79        | Td(1),Cd(2) / Cd(1),Ta(2)                |
| LOC121108189 | L / M               | 1.29 / 1.80        | Cd(1),Cd(2) / Cd(1),Ta(2)                |
| HINTW        | L                   | 1.39               | Ta(1),Cd(2)                              |
| LOC121108216 | L                   | 1.27               | Td(1),Con(2)                             |
| LOC121108223 | L                   | 1.36               | Td(1),Con(2)                             |
| LOC121108202 | L / M               | 1.29 / 1.69        | Cd(1),Ta(2) / To(1),Cd(2)                |
| UBAP2        | L                   | 1.36               | Cd(1),Td(2)                              |
| ATP5F1AW     | L / M               | 1.67 / 2.83        | Cd(1),Td(2) / Cd(1),Cd(2)                |
| LOC121108204 | L / M               | 1.61 / 1.81        | Cd(1),Td(2) / Cd(1),Td(2)                |
| LOC107055485 | L / M               | 1.86 / 0.75        | To(1),Td(2) / To(1),Cd(2)                |
| LOC107049046 | L                   | 1.41               | Cd(1),To(2)                              |
| LOC121108182 | L                   | 10.43              | Ta(1),To(2)                              |
| SPIN1L       | L / M               | 0.68 / 1.37        | Ta(1),To(2) / Td(1),Tu(2)                |
| LOC431003    | M                   | 0.77               | Cd(1),Cd(2)                              |
| UBE2R2L      | M                   | 1.77               | Cd(1),Ta(2)                              |
| LOC430766    | M                   | 1.31               | Cd(1),Td(2)                              |
| LOC427025    | M                   | 1.32               | Cd(1),Td(2)                              |
| LOC121108200 | M                   | 1.39               | Cd(1),Td(2)                              |
| LOC107049459 | M                   | 1.77               | Ta(1),Ta(2)                              |
| LOC100859467 | M                   | 1.29               | Td(1),Td(2)                              |
| LOC121108227 | M                   | 1.55               | Td(1),Ta(2)                              |
| LOC112530503 | M                   | 1.58               | Td(1),Td(2)                              |
| LOC121108221 | M                   | 2.51               | To(1),Ta(2)                              |
| LOC107055439 | M                   | 1.48               | To(1),To(2)                              |
| LOC121108224 | M                   | 0.75               | Tu(1),Ta(2)                              |
| LOC121108213 | M                   | 1.30               | Tu(1),Con(2)                             |
| LOC107055444 | M                   | 1.32               | Tu(1),Td(2)                              |

|                     |   |      |             |
|---------------------|---|------|-------------|
| <i>LOC121108220</i> | M | 0.43 | Td(1),Cd(2) |
| <i>MBD2</i>         | M | 0.61 | Tu(1),To(2) |

<sup>a</sup> Tissue=B(Brain), (M)Muscle, L(Liver); <sup>b</sup> FC= Paternal Expression ratio: TPMCor/TPMWL; <sup>c</sup> Regulatory diversity: Cd=Cis(dominant); Td=Trans(dominant); Ta=Trans(additive); To= Trans(over-dominant); Tu=Trans(under-dominant); Con=Conserved. (1),(2): Group 1, Group 2.
